# Supplementary material
Source: PubMed Central journal article supplement (PMC6014554)
Supplement: DB171509SupplementaryData.pdf [file DB171509SupplementaryData.pdf]

SUPPLEMENTARY DATA

**Supplementary Figure 1.** CLAMS data showing (A) food intake, (B) respiratory exchange ratio, (C) oxygen consumption and (D) carbon dioxide production from CLAMS data after 4 weeks of diet. (E) daily water intake and (F) activity (CLAMS data, 8 weeks of diet). Results are shown as mean  $\pm$  SEM of 3 animals per group, \* $P$ <0.05, \*\* $P$ <0.01, \*\*\* $P$ <0.001, # $P$ <0.0005, t-tests compared to controls.

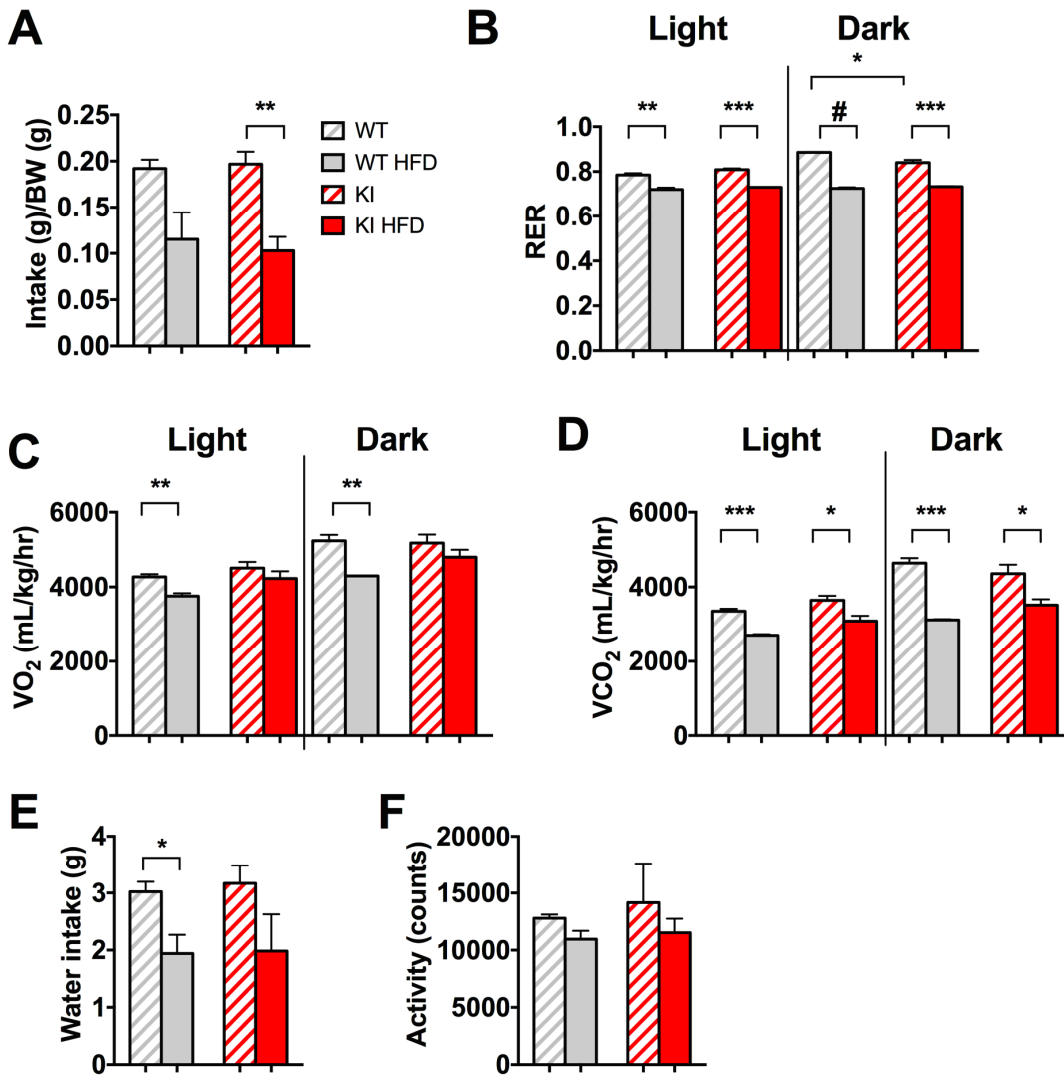

SUPPLEMENTARY DATA

**Supplementary Figure 2.** (A) Lean mass was measured by DEXA with results shown as mean  $\pm$  SEM of 6-9 animals per group. (B) Liver weight of WT and KI mice of CD or HFD at 8 weeks of age (n=12-14 animals per group). Legend in A is the same for B

**A**

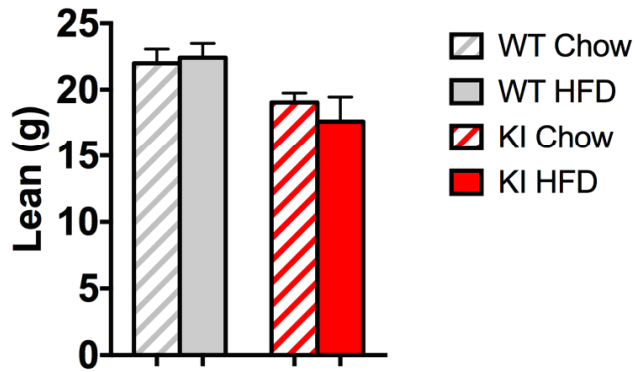

**B**

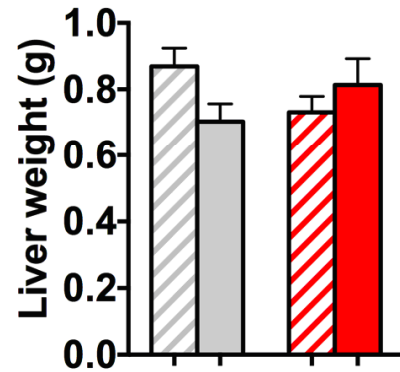

SUPPLEMENTARY DATA

**Supplementary Figure 3.** (A) Inguinal, (B) epididymal and (C) brown adipose tissue weight after 8 weeks on CD or HFD shown as percentage of body weight, presented as  $\pm$  SEM of 12-14 animals per group. (A) Inguinal, (B) epididymal and (C) brown adipose tissue weight at 8 weeks of age shown as percentage of body weight, presented as  $\pm$  SEM of 4-12 animals per group. \* $P < 0.05$ , \*\* $P < 0.01$ , \*\*\* $P < 0.001$ , # $P < 0.005$  one-way ANOVA

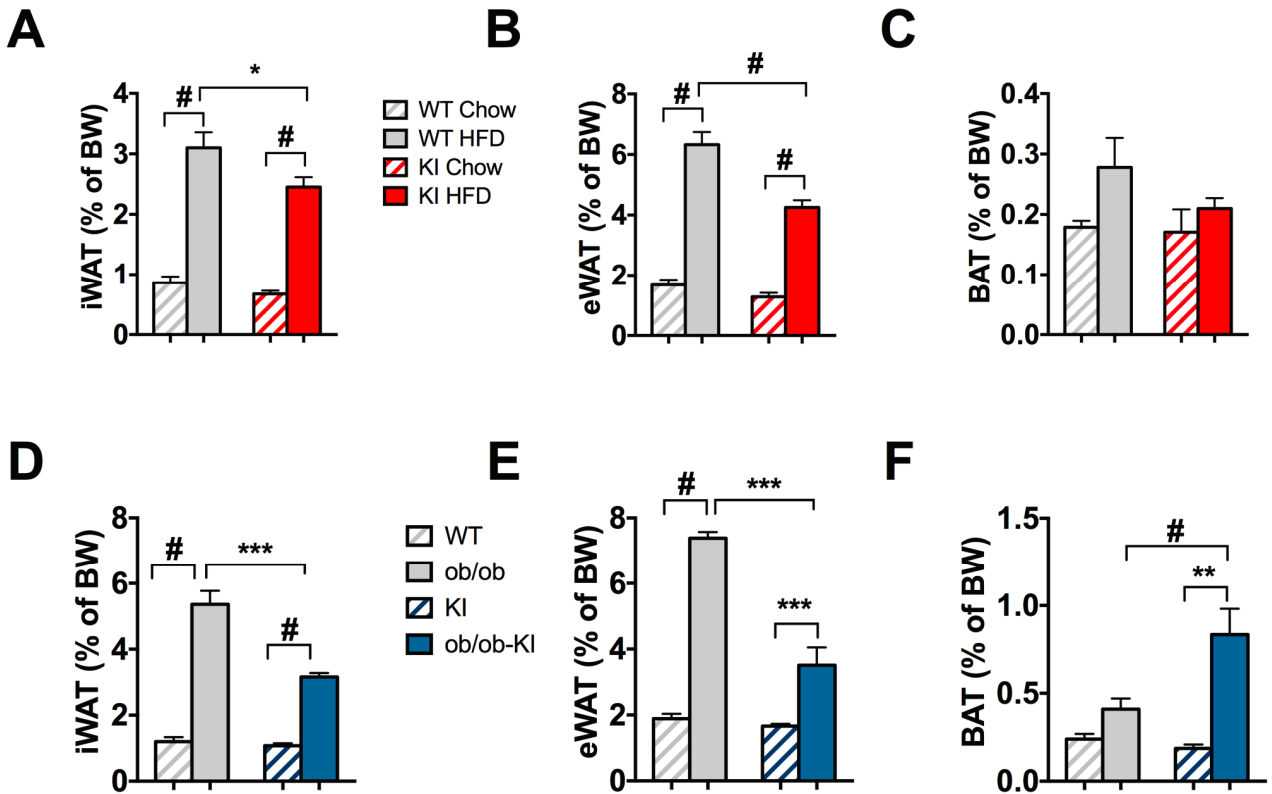

SUPPLEMENTARY DATA

**Supplementary Table 1.**

| <b>Gene</b>    | <b>Forward Sequence</b>     | <b>Reverse Sequence</b>     |
|----------------|-----------------------------|-----------------------------|
| Fas            | gag gac act caa gtg gct ga  | gtg agg ttg ctg tcg tct gt  |
| Hsl            | acg gat acc gta gtt tgg tgc | tcc aga agt gca cat cca ggt |
| Acl            | aat ggc cgt cat gtg agt tt  | gtg gcc cca act atc aag ag  |
| Atgl           | act gtg gcc tca ttc ctc ct  | aac tgg atg ctg gtg ttg gt  |
| C/EBP $\alpha$ | caa gaa cag caa cga gta ccg | gtc act ggt caa ctc cag cac |
| PPAR $\gamma$  | tgt tat ggg tga aac tct ggg | aga gct gat tcc gaa gtt gg  |
| Ap2            | gat gcc ttt gtg gga acc t   | ctg tcg tct gcg gtg att t   |
| F4/80          | aac tct gtc ctc ctt gcc tgg | cag caa cct cgt gtc ctt gag |
| Cd68           | cag ctg cct gac aag gga ca  | gga gga cca ggc caa tga tg  |
| Acc            | aac ctg agg gagcag ttc aa   | agg tca gct cgt ctg aca gg  |
| Scd1           | cag ccg agc ctt gta agt tc  | gct cta cac ctg cct ctt cg  |
| Cpt1           | agt ggc ctc aca gac tcc ag  | gcc cat gtt gta cag ctt cc  |
| Med            | gct acc agg ctg agg atc tg  | cct cat ggt caa cta ccg ct  |
| Hadha          | ctg gtc agc aga gca gaa ga  | att ggc agt ctc agt cgc tt  |
| Acad           | ccg act agg cca tct ttt ga  | gga gct aaa ggg atc tgc aac |
| Gapdh          | aac ttt ggc att gtg gaa g   | aca cat tgg ggg tag gaa a   |
| AldoB          | gct ggg caa ttt cag aga gc  | gag gac tct tcc cct ttg ct  |
| Eno1           | aga tcg acc tea aca gtg gg  | ctt aac gct ctc ctc ggt gt  |
| G6p            | gtg tcc aggacc cac caa ta   | act gtg ggc atc aat ctc ct  |
| Pepck          | tgt ctt cac tga ggt gcc ag  | ctg gat gaa gtt tga tgc cc  |
| Pgc1 $\alpha$  | ccc tgc cat tgt taa gac c   | tgc tgc tgt tcc tgt ttt c   |
| Err $\alpha$   | gca ggg cag tgg gaa gct     | cct ctt gaa gaa ggc ttt gca |
| Ppara          | aacatcgagtgtcgaatatgtgg     | ccg aat agt tcg ccg aaa gaa |
